# Supplementary material for: Elucidation of Geniposide and Crocin Accumulation and Their Biosysnthsis-Related Key Enzymes during Gardenia jasminoides Fruit Growth
Source: MDPI journal article supplement (doi:10.3390/plants12112209), 2023-06-03
Supplement: s1 [file s1]

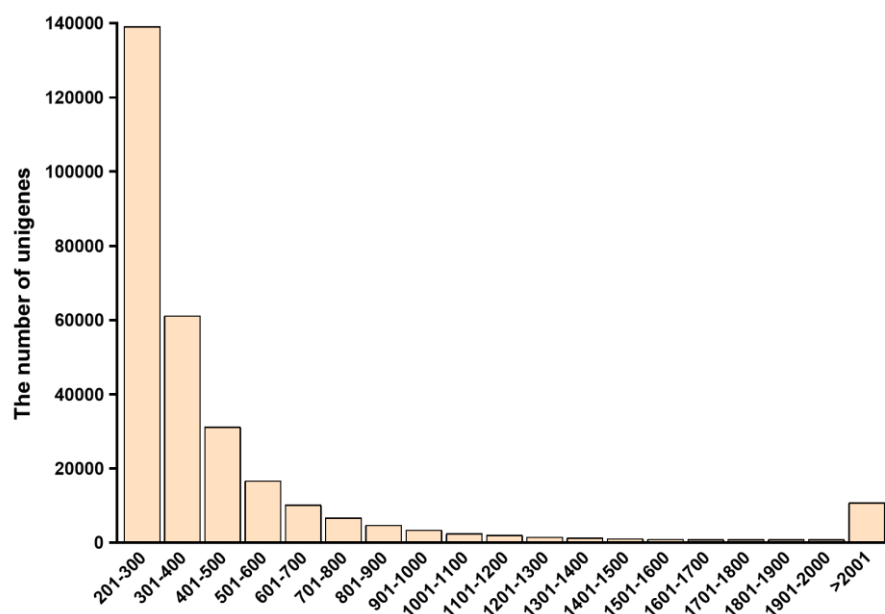

Figure S1. Frequency of *G. jasminoides* fruit unigenes

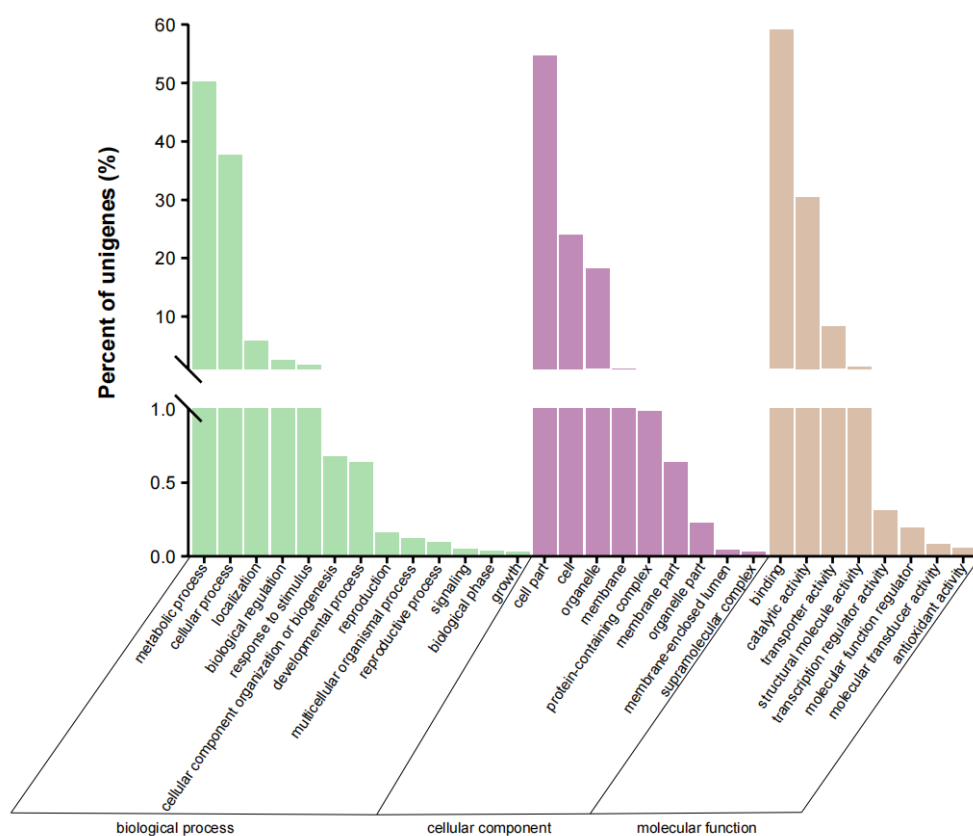

Figure S2. Gene Ontology ( GO ) pathways of *G. jasminoides* fruit unigenes

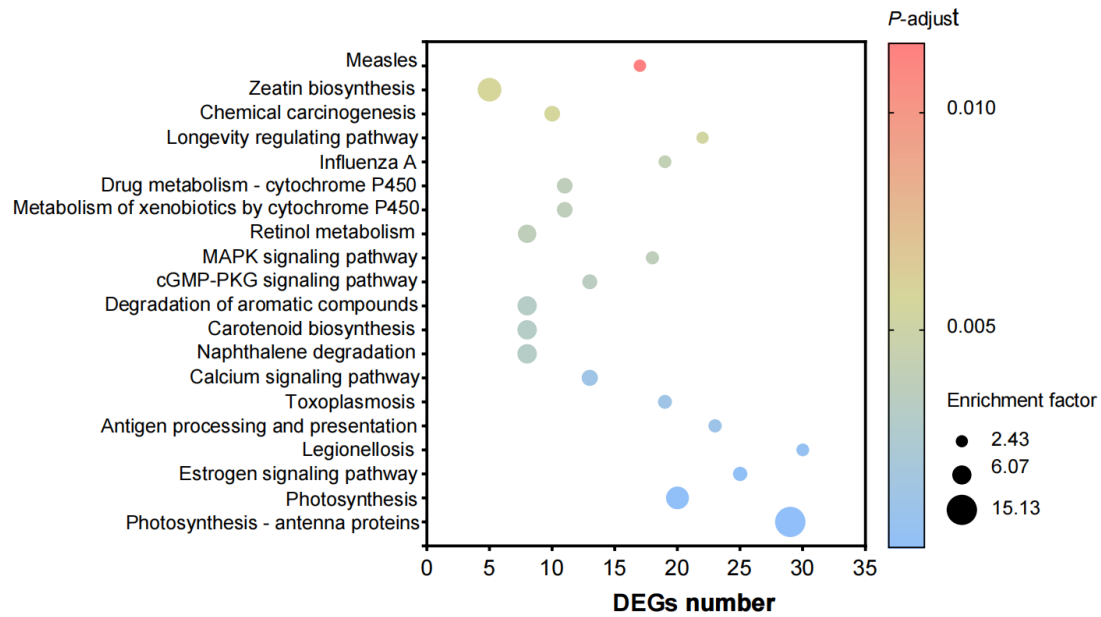

Figure S3. DEGs annotated by KEGG enrichment analysis in ' T1 vs T2 '

Table S1 qRT-PCR validation primer sequences

| Gene ID          | Forward (5'-3')       | Reverse (5'-3')      |
|------------------|-----------------------|----------------------|
| DN80963_c0_g1_i1 | CATGGTGGTGATGGCTCCTT  | CCCTCTCGGATAACGGAAGC |
| DN79822_c0_g2_i1 | GTGGATGGCCAATTCAGGGA  | TATAGCTCCACACGCAGCAG |
| DN78530_c1_g1_i2 | GATGGGGATGTGTTGCTCCA  | ACGGAGCGCCTTTCCATTTA |
| DN85606_c3_g3_i1 | TCGATGGAAGGTGCTGTTCT  | GCTTGCCTCAGGTATCCTCT |
| DN81253_c0_g1_i1 | TGGCATGGAGACCTTACTGAA | GCATGGCAAGCTCTCCTAGT |
| DN84511_c2_g4_i1 | GTCACTGCTCTGCTGCTACA  | GAAGCAGAGGAAGACTCGCA |

Table S2. Assembling of the sequencing data

| Statistics  | Number  | Total length ( bp ) | Average length ( bp ) | N50 ( bp ) | N90 ( bp ) |
|-------------|---------|---------------------|-----------------------|------------|------------|
| Transcripts | 384 421 | 321 711 569         | 836                   | 1859       | 288        |
| Unigenes    | 298 869 | 152 447 815         | 510                   | 567        | 246        |

Table S3. Functional annotation of *G.jasminoides* fruit in public protein databases

| Annotated Databases     | Total of Unigenes | Number of Unigenes | Percentage (%) |
|-------------------------|-------------------|--------------------|----------------|
| Annotated in NR         | 298 869           | 152 647            | 51.07%         |
| Annotated in Swiss_prot | 298 869           | 92 529             | 30.96%         |
| Annotated in pfam       | 298 869           | 91 287             | 30.54%         |
| Annotated in GO         | 298 869           | 23 358             | 7.82%          |
| Annotated in KEGG       | 298 869           | 46 940             | 15.71%         |
